## RESEARCH ARTICLE

# Deprescribing of proton pump inhibitors in older patients: A cost-effectiveness analysis

Mingxi Xie, Joyce H. S. You \*

School of Pharmacy, Faculty of Medicine, The Chinese University of Hong Kong, Hong Kong SAR, China

\* [joyceyou@cuhk.edu.hk](mailto:joyceyou@cuhk.edu.hk)

## Abstract

Over-prescribing of proton-pump inhibitors (PPIs) is widely observed in older patients. Clinical findings have showed that deprescribing service significantly decreased inappropriate PPIs utilization. We aimed to examine the cost-effectiveness of PPI deprescribing service from the perspective of Hong Kong public healthcare provider. A decision-analytic model was constructed to examine the clinical and economic outcomes of PPI deprescribing service (deprescribing group) and usual care (UC group) in a hypothetical cohort of older PPI-users aged  $\geq 65$  years in the ambulatory care setting. The model inputs were retrieved from literature and public data. The model time-frame was one-year. Base-case analysis and sensitivity analysis were performed. Primary model outcomes were direct medical cost and quality-adjusted life-years (QALYs) loss. In base-case analysis, the deprescribing service (versus UC) reduced total direct medical cost by USD235 and saved 0.0249 QALY per PPI user evaluated. The base-case results were robust to variation of all model inputs in one-way sensitivity analysis. In probabilistic sensitivity analysis, the deprescribing group was accepted as cost-effective (versus the UC group) in 100% of the 10,000 Monte Carlo simulations. In conclusion, the PPI deprescribing service saved QALYs and reduced total direct medical cost in older PPIs users, and showed a high probability to be accepted as the cost-effective option from the perspective of public healthcare provider in Hong Kong.

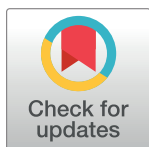

## OPEN ACCESS

**Citation:** Xie M, You JHS (2024) Deprescribing of proton pump inhibitors in older patients: A cost-effectiveness analysis. *PLoS ONE* 19(10): e0311658. <https://doi.org/10.1371/journal.pone.0311658>

**Editor:** Morteza Arab-Zozani, Birjand University of Medical Sciences, ISLAMIC REPUBLIC OF IRAN

**Received:** January 19, 2024

**Accepted:** September 23, 2024

**Published:** October 7, 2024

**Copyright:** © 2024 Xie, You. This is an open access article distributed under the terms of the [Creative Commons Attribution License](https://creativecommons.org/licenses/by/4.0/), which permits unrestricted use, distribution, and reproduction in any medium, provided the original author and source are credited.

**Data Availability Statement:** All relevant data are within the paper.

**Funding:** The author(s) received no specific funding for this work.

**Competing interests:** The authors have declared that no competing interests exist.

## Introduction

Proton-pump inhibitors (PPIs), the primary treatment for gastroesophageal reflux disease (GERD), have become the most popular prescription medication. It is estimated that PPIs utilization increased about 10.4-fold from 2004 to 2013 in Southwest China [1]. Over-prescription of PPIs was observed in 73.9% of older patients and PPIs use with non-evidence-based indications was found in approximately 60% of community-dwelling older patients [2]. In addition to the financial burden to healthcare system, PPIs was associated with increased risk of adverse events including pneumonia, Clostridium difficile infection (CDI) and hypomagnesemia [3].

A clinical practice guideline recommends deprescribing of PPIs in adults who have administered PPIs for at least 4 weeks to treat mild to moderate gastroesophageal reflux diseases, heartburn or esophagitis, and whose symptoms have been completely resolved [4]. Clinical

findings have showed that the deprescribing service significantly decreased PPIs utilization and medication expenditure in ambulatory care settings, and resulted in high rate of PPI deprescribing completion (80.0%) [5, 6]. However, the provision of deprescribing service requires manpower costs, and deprescribing may cause GERD rebound [7]. To facilitate the clinical and administrative decision-makers on resource allocation for the PPI-deprescribing service, we aimed to analyse the cost-effectiveness of PPI deprescribing in older patients from the perspective of public healthcare provider in Hong Kong.

## Materials and methods

### Model design

A decision-analytical model (Fig 1) was constructed to examine the clinical and economic outcomes of PPI deprescribing (deprescribing group) and usual care (UC group) in a hypothetical

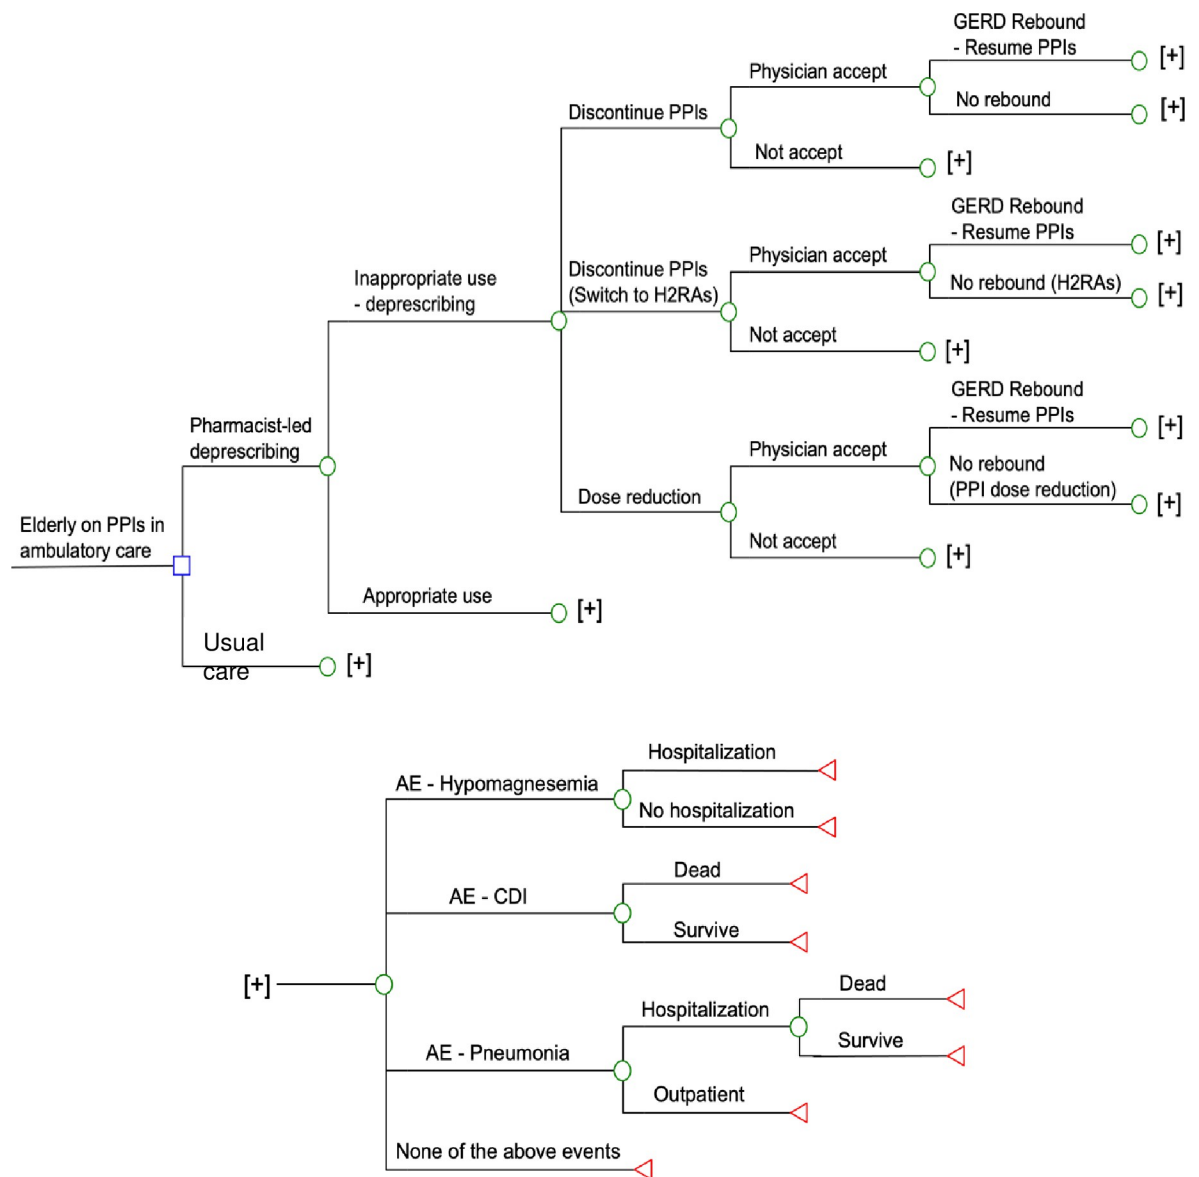

**Fig 1. Simplified decision-analytical model of proton pump inhibitor (PPI) deprescribing service versus usual care in older PPIs users.** AE: adverse event; GERD: gastroesophageal reflux disease; H2RAs: Histamine-2 receptor antagonists; PPIs: proton-pump inhibitors.

<https://doi.org/10.1371/journal.pone.0311658.g001>

cohort of older PPI-users aged  $\geq 65$  years in the ambulatory care setting. Decision tree is a form of decision-analytical model, and hypothetical patients proceed through health states based on probability inputs of the model. A recent retrospective study ( $n = 402$ ) reported that the mean onset of rebound symptoms was less than 20 days after PPI discontinuation [8]. A one-year time horizon was therefore applied in the present model to allow enough time for capturing the impact of deprescribing PPIs. Primary model outcomes were direct medical cost and quality-adjusted life-years (QALYs) loss.

Deprescribing is a planned process to discontinue or reduce doses of medications which do not provide benefits or cause harm to patients, under the supervision of healthcare professionals [4]. In the deprescribing group, a pharmacist-led PPI deprescribing service evaluated the appropriateness of PPI regimens and made one of the following recommendations to the prescriber for the inappropriate cases: PPI discontinuation, PPI dose reduction, and switching PPI to histamine-2 receptor antagonists (H2RAs) [4]. The prescriber might (or might not) accept the deprescribing recommendations. If GERD rebound occurred after deprescribing PPI, the PPI regimen would be reinstated [7]. In the UC group, no deprescribing service was provided and patients continued the PPI regimens.

In both study groups, all patients (PPI continued, dose-reduced, discontinued, or switched to H2RA) might (or might not) experience adverse events: Pneumonia, CDI, or hypomagnesemia [3]. Patients with hypomagnesemia might receive inpatient treatment. Low serum magnesium was associated with cardiovascular symptoms, but the direct causal relationship between hypomagnesemia and cardiac death was not supported [9]. Mortality associated with hypomagnesemia therefore was not included in the model. Patients with CDI were hospitalized and CDI-related deaths might occur. Patients with pneumonia might receive outpatient or inpatient treatment, and the hospitalized patients might survive or die.

## Clinical inputs

A literature search was conducted on PubMed and Google Scholar over the period 1995–2023. Search terms including (but not limited to) “proton pump inhibitors”, “gastroesophageal reflux disease”, “older adults”, “elderly”, “deprescribing”, “inappropriate use”, “overutilization”, “rebound symptoms”, “pneumonia”, “Clostridium difficile infection”, and “hypomagnesemia” were used as keywords and (if applicable) Medical Subject Headings (MeSH) terms. The selection criteria of studies for clinical model inputs of PPI-related outcomes were: (1) English-written reports; (2) patients aged  $\geq 65$  years using PPIs; and (3) one or more of the followings were reported: Incidence rate of inappropriate PPI use; prescribers’ acceptance to alternatives for replacing PPI therapy; symptomatic rebound rates after PPI deprescribing; adverse event (hypomagnesemia, pneumonia, Clostridium difficile infection) rates in PPI and non-PPI users. To estimate the clinical outcomes of adverse events (hypomagnesemia, pneumonia, Clostridium difficile infection), outcomes studies written in English were retrieved in literature using search terms such as “hypomagnesemia”, “pneumonia”, “Clostridium difficile infection”, “elderly”, “outcomes” as keywords and/or MeSH terms. Meta-analysis and randomized controlled trials were the preferred study types during the literature search. When an event/incidence rate was reported in multiple studies, the weighted average was used as the base-case value, and the highest and lowest values were considered in the sensitivity analysis.

The proportion of inappropriate PPI uses (78.52%; range 73.93%–84.05%) was approximated from findings of two cohort studies (total older patients on PPIs  $n = 512$ ) on PPI use evaluation [10, 11]. The distribution of PPI deprescribing interventions were estimated from findings of an observational study of 29,694 pharmacist interventions on PPIs: PPI discontinuation (32.79%; range 29.51%–36.07%), PPI dose reduction (22.25%; range 20.03%–24.48%)

and drug switch (44.96%; range 40.46%–49.45%). The prescriber acceptance rates on recommendations of PPI discontinuation (73.1%; range 65.79%–80.41%), PPI dose reduction (70.3%; range 63.27%–77.33%) and drug switch (88.0%; range: 79.20%–96.80%) were also reported by this study and adopted in the present model [12]. The occurrence of GERD rebound (78.67%; range: 70.80%–86.53%) after PPI discontinuation in long-term PPIs users ( $n = 97$ ) was retrieved from a double-blind, placebo-controlled trial [13]. The GERD rebound after PPI dose reduction (20.51%; range 18.46%–22.56%) was approximated from the findings of a prospective study ( $n = 117$ ) on PPI dose step-down in patients in remission of acid regurgitation [14]. The GERD rebound after drug switch to H2RAs (42.58%; range 38.32%–46.83%) was the pooled average of GERD treatment failure rate in H2RAs users [15–19].

The yearly event rates of adverse events in PPIs users were estimated using the yearly rate of an adverse event in non-PPI users and the corresponding odd ratios (OR) in PPIs users. The yearly event rate of hypomagnesemia in non-PPI users (6.89%; range 6.20%–7.58%) and the OR for PPIs users (1.775; 95%CI 1.077–2.924) were reported from a meta-analysis including nine studies with 115,455 patients [20]. The yearly event rate of pneumonia in non-PPI users (5.37%; range 4.83%–5.91%) was retrieved from data of a meta-analysis (8 studies) [21]. The OR of pneumonia for PPI users (1.490; 95%CI 1.16–1.92) was reported by a meta-analysis (26 studies), and the OR for low-dose PPIs users (1.173; 95%CI 1.110–1.239) was obtained from a sub-group meta-analysis (9 studies) [22, 23]. The CDI yearly event rate in non-PPI users (4.08%; range: 3.67%–4.48%) and the OR for PPIs users (2.15; 95%CI 1.81–2.55) were adopted from the findings of a meta-analysis (25 case-control and 5 cohort studies) [24]. The OR of CDI for low-dose PPIs users (1.28; 95%CI 0.94–1.74) was approximated from the findings of a hospital cohort study ( $n = 157,693$ ) on risk of CDI associated with PPIs use [25].

The hospitalization rate for hypomagnesemia (0.00131%; range 0.00118%–0.00144%) was estimated from a 10-year population-based case-control study of PPIs use and hospitalization with hypomagnesemia in older individuals [26]. The hospitalization rate for pneumonia (33.93%; range 30.54–37.32%) was retrieved from findings of a prospective study on hospitalization decision of ambulatory patients aged  $\geq 65$  years with pneumonia [27]. The in-hospital mortality rate of CDI in the older patients (8.8%; range:7.92%–9.68%) was reported by a retrospective analysis of 2.3 million community hospital discharges in the US [28]. The mortality rate of pneumonia among hospitalized older patients (11.0%; range: 9.9%–12.1%) was reported in a US national health care survey ( $n = 76857$ ) [29].

## Utility inputs

The QALY loss of each hypothetical patient was estimated using the age-specific health utility, health state-specific disutility, and time spent in the health state. The utility value for individuals aged  $\geq 65$  years (0.81; range 0.729–0.891) was adopted from the preference-based score in the US [30]. The disutility values for GERD symptoms with medications (0.0486; range 0–0.405) and without medications (0.0737; range 0–0.567) were retrieved from an observational study of 222 GERD patients [31]. The disutility value of patients hospitalized for hypomagnesemia (0.2430; range 0.1130–0.3730) was estimated from the EQ-5D measures of arrhythmia reported by a national cross-sectional survey, as arrhythmia was the main severe symptom of hypomagnesemia [32]. The disutility scores of pneumonia treated by hospitalization (0.5597; range 0.5022–0.6164) and treated by ambulatory care (0.3013; range 0.2649–0.3370) were estimated from outcomes of a cross-sectional analysis targeting pneumococcal diseases [33]. The disutility score of CDI (0.3985; range 0.3587–0.4384) was approximated from findings of prospective study on utility decrement associated with CDI [34]. The length of hospitalization for hypomagnesemia (6 days; range 4–9), pneumonia (9.8 days; range 9.3–

10) and CDI (8 days; range 5–14) were retrieved from relevant health outcome studies [28, 35, 36]. The convalescence period of pneumonia (31 days; range 13–55) was estimated from the findings of a population-based epidemiological study (n = 241) [37]. The QALY loss for death (associated with pneumonia or CDI) was calculated by the age-specific utility and remaining life expectancy. The age-specific remaining life expectancy was obtained from the life expectancy table reported by the Census and Statistics Department of Hong Kong [38]. In this model, the base-case value of patient age (80 years; range 65–88 years) was adopted from a prospective study on PPIs overutilization in older patients [11]. The QALY loss due to mortality was discounted to the current year at 3% annual rate.

## Cost inputs

Costs analysis was conducted from the perspective of public healthcare provider in Hong Kong. Costs of public healthcare services were estimated by the unit cost and utilization. Hospitalization daily cost and cost per clinic visit were retrieved from the Hospital Authority, the public healthcare provider in Hong Kong [39]. The number of clinic visits required for pneumonia (3, range 2–4) was estimated from a health economic study on community-acquired pneumonia [40]. The length of hospitalization of adverse events were described above in the “Utility inputs” section. Monthly medication costs of standard doses of PPIs, low doses of PPIs and standard doses of H2RAs were drug acquisition costs adjusted to current year [41]. The cost of deprescribing PPI service was estimated by the salary of pharmacist and the time spent (34 minutes; range 28–40) on each case, reported by a pharmacist-led deprescribing pilot program [42, 43]. The present model timeframe was one year, and discounting was therefore not applied to model cost outputs. All model parameters were shown in [Table 1](#).

## Cost-effective analysis and sensitivity analyses

TreeAge Pro 2023 (TreeAge Software Inc, Williamstown, MA, USA) and Excel 365 (Microsoft Corporation, Redmond, WA, USA) were used to conduct the cost-effectiveness and sensitivity analyses. The deprescribing group was cost-effective if it (1) saved QALY at lower cost (dominant), or (2) saved QALY at higher cost and the incremental cost per QALY gained (ICER = Incremental Cost/ QALY saved) was below the willingness-to-pay (WTP) threshold. The World Health Organization suggested that a strategy is highly cost-effective if the ICER is less than 1× gross domestic product (GDP) per capita [44]. The GDP per capita of Hong Kong in 2022 (USD49,023; USD1 = HKD7.8) was therefore adopted as the WTP threshold [45].

The range for sensitivity analysis of each model input was formed by the range, 95% confidence interval (if available), or ± 10% of the base-case value. One-way sensitivity analysis was conducted by varying each model parameter over the range for sensitivity analysis. Monte Carlo simulations were used for probabilistic sensitivity analysis. The cost and QALY loss of both study groups were simulated 10,000 times by simultaneously drawing all model parameters from the parameter-specific distribution specified in [Table 1](#). The incremental cost and QALY saved by the deprescribing group versus UC group in the Monte Carlo simulations were presented in a scatter plot.

## Results and discussion

### Base-case analysis results

The expected cost and QALY loss of each study group are shown in [Table 2](#). Comparing with the UC group, the deprescribing group saved 0.0249 QALYs and reduced cost by USD235 per

**Table 1. Model inputs.**

| Variables                                                      | Base-case value | Range for sensitivity analysis | Distribution | reference |
|----------------------------------------------------------------|-----------------|--------------------------------|--------------|-----------|
| <i>Clinical Inputs</i>                                         |                 |                                |              |           |
| Inappropriate PPI use                                          | 0.7852          | 0.7393–0.8405                  | Beta         | [10, 11]  |
| Deprescribing service recommendations on inappropriate PPI use |                 |                                |              |           |
| PPIs discontinuation                                           | 0.3279          | 0.2951–0.3607                  | Beta         | [12]      |
| PPIs dose reduction                                            | 0.2225          | 0.2003–0.2448                  | Beta         | [12]      |
| Switch to H2RAs                                                | 0.4496          | 0.4046–0.4945                  | Beta         | [12]      |
| Prescribers' acceptance to recommendations                     |                 |                                |              |           |
| PPIs discontinuation                                           | 0.7310          | 0.6579–0.8041                  | Beta         | [12]      |
| PPIs dose reduction                                            | 0.7030          | 0.6327–0.7733                  | Beta         | [12]      |
| Switch to H2RAs                                                | 0.8800          | 0.7920–0.9680                  | Beta         | [12]      |
| Rebound rates                                                  |                 |                                |              |           |
| PPIs discontinuation                                           | 0.7867          | 0.7080–0.8653                  | Beta         | [13]      |
| PPIs dose reduction                                            | 0.2051          | 0.1846–0.2256                  | Beta         | [14]      |
| Switch to H2RAs                                                | 0.4258          | 0.3832–0.4683                  | Beta         | [15–19]   |
| Yearly event rate in non-PPI users                             |                 |                                |              |           |
| Hypomagnesemia                                                 | 0.0689          | 0.0620–0.0758                  | Beta         | [20]      |
| Pneumonia                                                      | 0.0537          | 0.0483–0.0591                  | Beta         | [21]      |
| Clostridium difficile infection                                | 0.0408          | 0.0367–0.0448                  | Beta         | [24]      |
| Odd ratios for PPI users                                       |                 |                                |              |           |
| Hypomagnesemia                                                 | 1.775           | 1.077–2.924                    | Triangular   | [30]      |
| Pneumonia                                                      | 1.490           | 1.160–1.920                    | Triangular   | [22]      |
| Clostridium difficile infection                                | 2.150           | 1.810–2.550                    | Triangular   | [24]      |
| Odd ratios for PPI users with low dose                         |                 |                                |              |           |
| Hypomagnesemia                                                 | 1.775           | 1.077–2.924                    | Triangular   | [20]      |
| Pneumonia                                                      | 1.173           | 1.110–1.239                    | Triangular   | [23]      |
| Clostridium difficile infection                                | 1.280           | 0.940–1.740                    | Triangular   | [25]      |
| Hospitalization rates                                          |                 |                                |              |           |
| Hypomagnesemia                                                 | 0.0000131       | 0.0000118–0.0000144            | Beta         | [26]      |
| Pneumonia                                                      | 0.3393          | 0.3054–0.3732                  | Beta         | [27]      |
| In-hospital mortality rates                                    |                 |                                |              |           |
| Clostridium difficile infection                                | 0.0880          | 0.0792–0.0968                  | Beta         | [28]      |
| Pneumonia                                                      | 0.1100          | 0.0990–0.1210                  | Beta         | [29]      |
| <i>Utility inputs</i>                                          |                 |                                |              |           |
| Age (years)                                                    | 80              | 65–88                          | Triangular   | [11]      |
| Health Utility for older persons aged > 65                     | 0.810           | 0.729–0.891                    | Triangular   | [30]      |
| Disutility values for symptomatic relapse                      |                 |                                |              |           |
| On medications                                                 | 0.0486          | 0–0.405                        | Triangular   | [31]      |
| Off medications                                                | 0.0737          | 0–0.567                        | Triangular   | [31]      |
| Disutility values for adverse events                           |                 |                                |              |           |
| Hospitalization for hypomagnesemia                             | 0.2430          | 0.1130–0.3730                  | Triangular   | [32]      |
| Hospitalized pneumonia                                         | 0.5597          | 0.5022–0.6164                  | Triangular   | [33]      |
| Ambulatory pneumonia                                           | 0.3013          | 0.2649–0.3370                  | Triangular   | [33]      |
| Clostridium difficile infection                                | 0.3985          | 0.3587–0.4384                  | Triangular   | [34]      |
| Length of hospital stay (days)                                 |                 |                                |              |           |
| Hypomagnesemia                                                 | 6               | 4–9                            | Triangular   | [36]      |
| Pneumonia                                                      | 9.8             | 9.3–10                         | Triangular   | [35]      |
| Clostridium difficile infection                                | 8               | 5–14                           | Triangular   | [28]      |

(Continued)

Table 1. (Continued)

| Variables                                                 | Base-case value | Range for sensitivity analysis | Distribution | reference |
|-----------------------------------------------------------|-----------------|--------------------------------|--------------|-----------|
| Convalescence period for pneumonia (days)                 | 31              | 13–55                          | Triangular   | [37]      |
| Length for outpatient pneumonia (days)                    | 31              | 13–55                          | Triangular   | [37]      |
| <i>Cost Inputs</i>                                        |                 |                                |              |           |
| Direct monthly medication costs (USD)                     |                 |                                |              |           |
| Standard dose of PPIs                                     | 54              | 47–65                          | Gamma        | [41]      |
| Low dose of PPIs                                          | 42              | 38–47                          | Gamma        | [41]      |
| Standard dose of H2RA                                     | 6               | 1.7–10                         | Gamma        | [41]      |
| Public healthcare services fees                           |                 |                                |              |           |
| Hospitalization cost per day (USD)                        | 654             | -                              |              | [39]      |
| Clinic cost per visit (USD)                               | 57              | -                              |              | [39]      |
| Clinic visits for pneumonia                               | 3               | 2–4                            | Triangular   | [40]      |
| Deprescribing service                                     |                 |                                |              |           |
| Pharmacist monthly salary (USD)                           | 10,918          | 7,358–14,478                   | Gamma        | [42]      |
| Pharmacist-time spent on deprescribing (minutes per case) | 34              | 28–40                          | Triangular   | [43]      |

<https://doi.org/10.1371/journal.pone.0311658.t001>

PPI user. The deprescribing group was dominant and therefore preferred as the cost-effective option from the perspective of public healthcare provider in Hong Kong.

### Sensitivity analyses results

One-way sensitivity analysis was performed on all model inputs, and no threshold value was found. The deprescribing group remained QALY-saving at lower total cost when comparing to the UC group throughout one-way sensitivity analysis of all model inputs. The top five influential model parameters on the ICER of deprescribing group are showed in a tornado diagram (Fig 2).

Probabilistic sensitivity analysis was performed by conducting 10,000 Monte Carlo simulations on direct medical costs and QALY loss for each study group. When comparing to the UC group, QALYs and medical costs saved by the deprescribing group were 0.02891 QALYs (95% CI 0.02874–0.02908;  $p < 0.001$ ) and USD248 (95%CI 243–254;  $p < 0.001$ ), respectively. The incremental costs and QALYs saved by the deprescribing group versus UC group were shown in the scatter plot (Fig 3). Comparing with the UC group, the deprescribing group gained QALYs and saved cost in 100% and 91.5% of 10,000 simulations, respectively. The probability of the deprescribing group to be cost-effective was 100%.

### Discussion

The present cost-effectiveness analysis examined the direct medical costs and QALY saved by the PPI deprescribing service in older PPIs users. The base-case results found the deprescribing service to save cost (by USD235 per PPI user evaluated) and QALYs (by 0.0249 QALYs per

Table 2. Base-case results.

| Strategy          | Cost (USD) | Incremental Cost (USD) | QALY Loss | QALY saved | Incremental cost-effectiveness ratio (ICER) |
|-------------------|------------|------------------------|-----------|------------|---------------------------------------------|
| Usual care        | 1,296      | -                      | 0.2397    | -          | -                                           |
| PPI Deprescribing | 1,061      | -235                   | 0.2148    | 0.0249     | -9,438 (Dominant)                           |

PPI Deprescribing saved QALY at lower cost (dominant) and was accepted as cost-effective.

<https://doi.org/10.1371/journal.pone.0311658.t002>

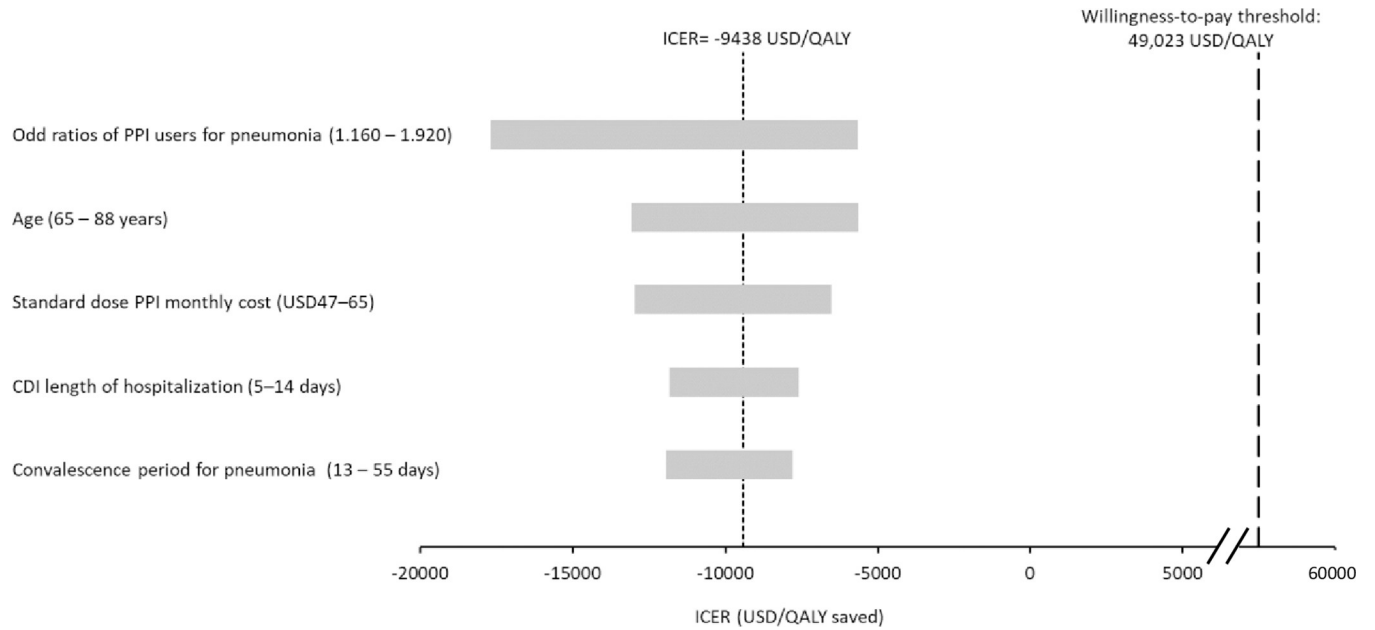

**Fig 2. Tornado diagram of top 5 influential factors in one-way sensitivity analysis on incremental cost-effectiveness ratio (ICER) of the proton pump inhibitors deprescribing service versus usual care.**

<https://doi.org/10.1371/journal.pone.0311658.g002>

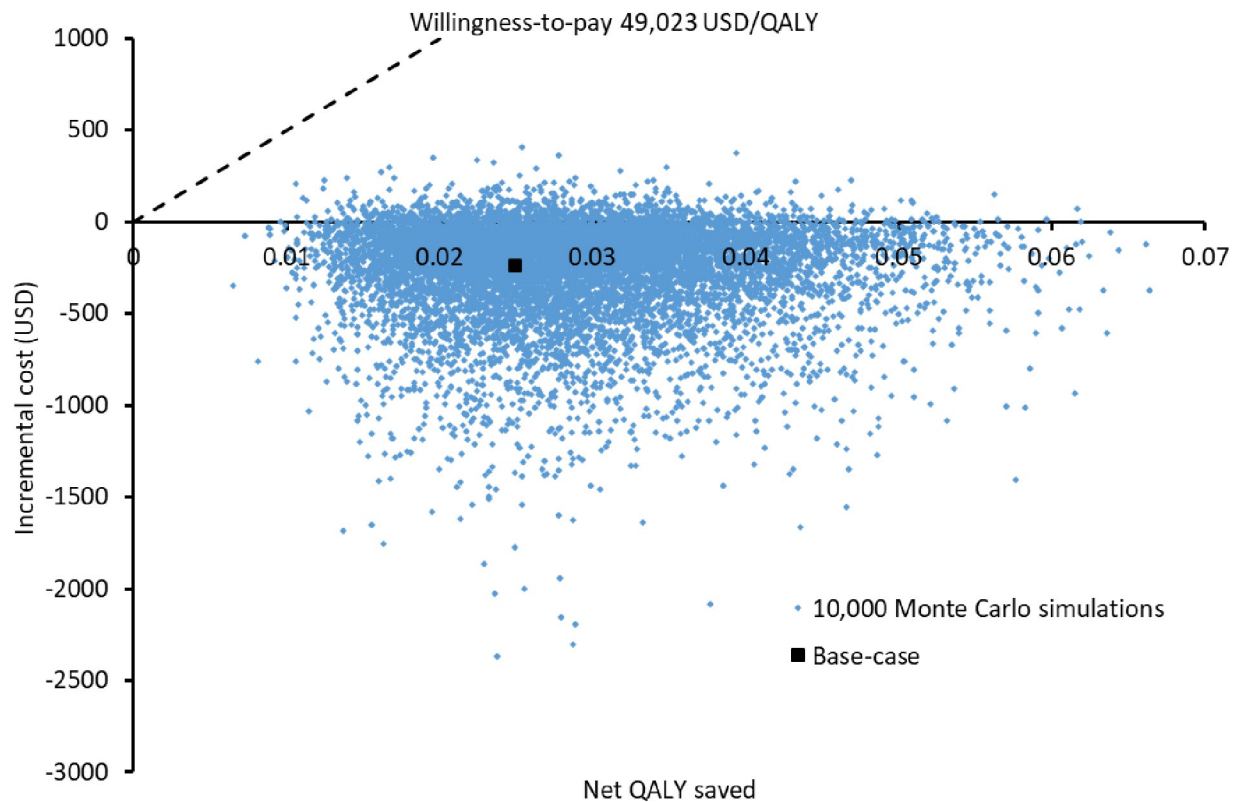

**Fig 3. Scatter plot of the incremental cost against QALY gained by the proton pump inhibitors deprescribing service versus usual care in 10,000 Monte Carlo simulations.**

<https://doi.org/10.1371/journal.pone.0311658.g003>



PPI user evaluated) from the perspective of public healthcare provider in Hong Kong. The robustness of base-case findings was further demonstrated by one-way and probabilistic sensitivity analyses that the direct costs and QALY loss of the deprescribing group remained lower than those of the UC group.

The cost-saving and QALY gained generated by the deprescribing service were driven by the reduced cases of adverse events associated with PPIs use in older patients. As showed by the top five influential factors on the ICER of deprescribing group in the one-way sensitivity analysis, the economic and clinical parameters of PPI-associated pneumonia and CDI were the drivers of the total cost and QALY loss. Lowering the cases of the major adverse events consequently reduced the direct medical costs and QALY loss. The cost avoidance by reducing adverse events outweighed the cost of deprescribing service, and therefore generated cost-saving.

Deprescribing services led by pharmacists on potentially inappropriate medications in older adults were previously examined, and the effectiveness were measured as the change of hospitalization rate and mortality. A systematic review including nine studies reported that pharmacist-led deprescribing for older adults in ambulatory care settings was effective in reducing the use of inappropriate medications, resulting in reduction in hospitalization and mortality [46]. A cost-utility analysis found that it was potentially cost-saving (by €170.46) with QALY gained (by 0.003 QALYs) to discontinue PPIs in older patients who extended PPIs use after the cessation of non-steroidal anti-inflammatory drugs (NSAID) and low doses of aspirin [47]. Apart from PPIs, the benefits of pharmacist-led deprescribing of other medications have been evaluated. Sanyal et al. reported deprescribing of NSAID by pharmacists in community-dwelling older people was cost-saving (CAD1008.61) and effective (0.11 QALYs gained) when compared to usual care [48]. Furthermore, a cost-utility analysis conducted in Canada demonstrated that pharmacist-led deprescribing of sedatives in community settings was a cost-effective strategy with cost reduction of CAD1392.05 and 0.0769 QALYs gained [49]. The prior cost-effectiveness findings are consistent with results of present study that the deprescribing is a cost-effective service.

Prolonged PPI usage increases risk of adverse outcomes, such as pneumonia, CDI and hypomagnesemia [3]. Despite the successful deprescribing reported in clinical studies [5, 6], the occurrence of symptomatic rebound [7, 8] and uncertainty in cost-effectiveness of PPI deprescribing are hurdles for Hong Kong public health policy makers and budget holders to invest resources to the deprescribing intervention. The present cost-effectiveness study considered the key elements in PPI deprescribing service implementation: Incidence of inappropriate PPI usage, types of deprescribing (discontinuation, dose reduction, change of therapeutic agent) and corresponding acceptance rate and rebound rate, risks of major adverse events associated with PPI users, direct costs of the deprescribing service, and treatment costs and health-related utility values of major adverse events and rebound. Our study provided comprehensive cost-effectiveness evidence to public health policy makers and budget holders to facilitate the informed decision-making process on PPI deprescribing intervention for elderly patients in Hong Kong.

Despite clinical effectiveness findings are generalizable across countries in general, the health economic findings of effective health services are country/region specific. It is therefore important to generate health system- and region-specific cost-effectiveness data to inform the decision-maker on deprescribing services. The decision-analytic model developed in the present study, including the key clinical, disutility and cost inputs for PPI describing, is readily to be adopted in another setting (of different prevalence of inappropriate PPIs use and resource utilization) by using region-specific parameters to inform the model. The model-generated outcomes are also readily to be update with new epidemiology data (when available) to

continuously inform the clinicians and healthcare administrators on the cost-effective use of PPI deprescribing service.

The strength of study included translating clinical findings (including epidemiology of inappropriate PPI usage, risk of adverse events associated with PPIs, deprescribing rates of PPI deprescribing intervention, rebound rate after deprescribing) into direct medical costs and QALY. The study provided health economic evidence on the cost-effectiveness of PPI deprescribing by considering both the benefits (avoidance of PPI-associated adverse events) and disadvantages (rebound of symptoms) of the intervention. The weakness of study included limitations associated with uncertainties of model inputs. Majority of model clinical inputs were retrieved from oversea studies, and might affect the generalizability of model results to patients in Hong Kong. Rigorous sensitivity analyses were therefore performed to examine the impact of all model input uncertainties on the robustness of base-case results. The model simplified the adverse events associated with long-term PPIs use to those key events with clinical symptoms (hypomagnesemia, CDI and pneumonia). The simplified model did not capture some undesired outcomes of inappropriate PPIs use, such as changes in gut microbiome [3]. The present analysis was conducted on direct medical costs, and indirect costs including productivity loss were not considered. The present findings might therefore underestimate the total cost saving and QALY gained by the deprescribing intervention.

## Conclusions

In conclusion, the PPI deprescribing service saved QALYs and reduced total direct medical cost in older PPIs users, and showed a high probability to be accepted as the cost-effective option from the perspective of public healthcare provider in Hong Kong.

## Author Contributions

**Conceptualization:** Mingxi Xie, Joyce H. S. You.

**Data curation:** Mingxi Xie, Joyce H. S. You.

**Formal analysis:** Mingxi Xie, Joyce H. S. You.

**Investigation:** Mingxi Xie, Joyce H. S. You.

**Methodology:** Mingxi Xie, Joyce H. S. You.

**Project administration:** Mingxi Xie.

**Resources:** Joyce H. S. You.

**Software:** Joyce H. S. You.

**Supervision:** Joyce H. S. You.

**Validation:** Joyce H. S. You.

**Writing – original draft:** Mingxi Xie.

**Writing – review & editing:** Joyce H. S. You.

## References

1. Zeng W, Finlayson AE, Shankar S, de Bruyn W, Godman B. Prescribing efficiency of proton pump inhibitors in China: influence and future directions. *BMC Health Serv Res.* 2015; 15:11. <https://doi.org/10.1186/s12913-014-0638-6> PMID: 25609265

2. Rababa M, Rababa'h A. The inappropriate use of proton pump inhibitors and its associated factors among community-dwelling older adults. *Heliyon*. 2021; 7(7):e07595. <https://doi.org/10.1016/j.heliyon.2021.e07595> PMID: 34337188
3. Kinoshita Y, Ishimura N, Ishihara S. Advantages and Disadvantages of Long-term Proton Pump Inhibitor Use. *J Neurogastroenterol Motil*. 2018; 24(2):182–196. <https://doi.org/10.5056/jnm18001> PMID: 29605975
4. Farrell B, Pottie K, Thompson W, Boghossian T, Pizzola L, Rashid FJ, et al. Deprescribing proton pump inhibitors: Evidence-based clinical practice guideline. *Can Fam Physician*. 2017; 63(5):354–364. PMID: 28500192
5. Bundeff AW, Zaiken K. Impact of clinical pharmacists' recommendations on a proton pump inhibitor taper protocol in an ambulatory care practice. *J Manag Care Pharm*. 2013; 19(4):325–33. <https://doi.org/10.18553/jmcp.2013.19.4.325> PMID: 23627578
6. Tandun R, Bubbar C, Tejani AM. Who has the guts to deprescribe proton pump inhibitors? A pharmacist-led intervention in a long-term care facility setting. *Aging Med (Milton)*. 2019; 2(2):112–117. <https://doi.org/10.1002/agsm2.12063> PMID: 31942521
7. Helgadottir H, Bjornsson ES. Problems Associated with Deprescribing of Proton Pump Inhibitors. *Int J Mol Sci*. 2019; 20(21):5469. <https://doi.org/10.3390/ijms20215469> PMID: 31684070
8. Barraquer Comes A, Roy Millán P. Proton Pump Inhibitor Deprescription Prospective Study in Patients Without Indication: Are There Differences in Proportion of Restarts According to Withdrawal Strategy?. *J Pharm Technol*. 2023; 39(5):224–230. <https://doi.org/10.1177/87551225231195216> PMID: 37745729
9. Kieboom BC, Niemeijer MN, Leening MJ, van den Berg ME, Franco OH, Deckers JW, et al. Serum Magnesium and the Risk of Death From Coronary Heart Disease and Sudden Cardiac Death. *J Am Heart Assoc*. 2016; 5(1):e002707. <https://doi.org/10.1161/JAHA.115.002707> PMID: 26802105
10. Delcher A, Hily S, Boureau AS, Chapelet G, Berrut G, de Decker L. Multimorbidities and Overprescription of Proton Pump Inhibitors in Older Patients. *PLoS One*. 2015; 10(11):e0141779. <https://doi.org/10.1371/journal.pone.0141779> PMID: 26535585
11. Voukelatou P, Vrettos I, Emmanouilidou G, Dodos K, Skotsimara G, Kontogeorgou D, et al. Predictors of Inappropriate Proton Pump Inhibitors Use in Elderly Patients. *Curr Gerontol Geriatr Res*. 2019; 2019:7591045. <https://doi.org/10.1155/2019/7591045> PMID: 30713553
12. Yailian AL, Huet E, Charpiat B, Conort O, Juste M, Roubille R, et al. Characteristics of Pharmacists' Interventions Related to Proton-Pump Inhibitors in French Hospitals: An Observational Study. *Int J Clin Pract*. 2022; 2022:9619699. <https://doi.org/10.1155/2022/9619699> PMID: 35846437
13. Björnsson E, Abrahamsson H, Simrén M, Mattsson N, Jensen C, Agerforz P, et al. Discontinuation of proton pump inhibitors in patients on long-term therapy: a double-blind, placebo-controlled trial. *Aliment Pharmacol Ther*. 2006; 24(6):945–54. <https://doi.org/10.1111/j.1365-2036.2006.03084.x> PMID: 16948806
14. Inadomi JM, McIntyre L, Bernard L, Fendrick AM. Step-down from multiple- to single-dose proton pump inhibitors (PPIs): a prospective study of patients with heartburn or acid regurgitation completely relieved with PPIs. *Am J Gastroenterol*. 2003; 98(9):1940–4. <https://doi.org/10.1111/j.1572-0241.2003.07665.x> PMID: 14499769
15. Sigterman KE, van Pinxteren B, Bonis PA, Lau J, Numans ME. Short-term treatment with proton pump inhibitors, H2-receptor antagonists and prokinetics for gastro-oesophageal reflux disease-like symptoms and endoscopy negative reflux disease. *Cochrane Database Syst Rev*. 2013; 2013(5):CD002095. <https://doi.org/10.1002/14651858.CD002095.pub5> PMID: 23728637
16. Venables TL, Newland RD, Patel AC, Hole J, Wilcock C, Turbitt ML. Omeprazole 10 milligrams once daily, omeprazole 20 milligrams once daily, or ranitidine 150 milligrams twice daily, evaluated as initial therapy for the relief of symptoms of gastro-oesophageal reflux disease in general practice. *Scand J Gastroenterol*. 1997; 32(10):965–73. <https://doi.org/10.3109/00365529709011211> PMID: 9361167
17. Fujiwara Y, Higuchi K, Nebiki H, Chono S, Uno H, Kitada K, et al. Famotidine vs. omeprazole: a prospective randomized multicentre trial to determine efficacy in non-erosive gastro-oesophageal reflux disease. *Aliment Pharmacol Ther*. 2005; 21 Suppl 2:10–8.
18. Bate CM, Green JR, Axon AT, Murray FE, Tildesley G, Emmas CE, et al. Omeprazole is more effective than cimetidine for the relief of all grades of gastro-oesophageal reflux disease-associated heartburn, irrespective of the presence or absence of endoscopic oesophagitis. *Aliment Pharmacol Ther*. 1997; 11(4):755–63. <https://doi.org/10.1046/j.1365-2036.1997.00198.x> PMID: 9305486
19. Paré P, Armstrong D, Pericak D, Pyzyk M. Pantoprazole rapidly improves health-related quality of life in patients with heartburn: a prospective, randomized, double blind comparative study with nizatidine. *J Clin Gastroenterol*. 2003; 37(2):132–8. <https://doi.org/10.1097/00004836-200308000-00008> PMID: 12869883

20. Park CH, Kim EH, Roh YH, Kim HY, Lee SK. The association between the use of proton pump inhibitors and the risk of hypomagnesemia: a systematic review and meta-analysis. *PLoS One*. 2014; 9(11): e112558. <https://doi.org/10.1371/journal.pone.0112558> PMID: 25394217
21. Eom CS, Jeon CY, Lim JW, Cho EG, Park SM, Lee KS. Use of acid-suppressive drugs and risk of pneumonia: a systematic review and meta-analysis. *CMAJ*. 2011; 183(3):310–9. <https://doi.org/10.1503/cmaj.092129> PMID: 21173070
22. Lambert AA, Lam JO, Paik JJ, Ugarte-Gil C, Drummond MB, Crowell TA. Risk of community-acquired pneumonia with outpatient proton-pump inhibitor therapy: a systematic review and meta-analysis. *PLoS One*. 2015; 10(6):e0128004. <https://doi.org/10.1371/journal.pone.0128004> PMID: 26042842
23. Giuliano C, Wilhelm SM, Kale-Pradhan PB. Are proton pump inhibitors associated with the development of community-acquired pneumonia? A meta-analysis. *Expert Rev Clin Pharmacol*. 2012; 5(3):337–44. <https://doi.org/10.1586/ecp.12.20> PMID: 22697595
24. Deshpande A, Pant C, Pasupuleti V, Rolston DD, Jain A, Deshpande N, et al. Association between proton pump inhibitor therapy and *Clostridium difficile* infection in a meta-analysis. *Clin Gastroenterol Hepatol*. 2012; 10(3):225–33. <https://doi.org/10.1016/j.cgh.2011.09.030> PMID: 22019794
25. Park YH, Seong JM, Cho S, Han HW, Kim JY, An SH, et al. Effects of proton pump inhibitor use on risk of *Clostridium difficile* infection: a hospital cohort study. *J Gastroenterol*. 2019 Dec; 54(12):1052–1060. <https://doi.org/10.1007/s00535-019-01598-2> PMID: 31187275
26. Zipursky J, Macdonald EM, Hollands S, Gomes T, Mamdani MM, Paterson JM, et al. Proton pump inhibitors and hospitalization with hypomagnesemia: a population-based case-control study. *PLoS Med*. 2014; 11(9):e1001736. <https://doi.org/10.1371/journal.pmed.1001736> PMID: 25268962
27. Laurichesse H, Gerbaud L, Baud O, Gourdon F, Beytout J; Study Group of General Practitioners. Hospitalization decision for ambulatory patients with community-acquired pneumonia: a prospective study with general practitioners in France. *Infection*. 2001; 29(6):320–5. <https://doi.org/10.1007/s15010-001-1020-2> PMID: 11787832
28. Pechal A, Lin K, Allen S, Reveles K. National age group trends in *Clostridium difficile* infection incidence and health outcomes in United States Community Hospitals. *BMC Infect Dis*. 2016; 16(1):682. <https://doi.org/10.1186/s12879-016-2027-8> PMID: 27855653
29. Peters ZJ, Ashman JJ, Schwartzman A, DeFrances CJ. National Hospital Care Survey Demonstration Projects: Examination of Inpatient Hospitalization and Risk of Mortality Among Patients Diagnosed With Pneumonia. *Natl Health Stat Report*. 2022;(167):1–9. PMID: 35089854
30. Sullivan PW, Lawrence WF, Ghushchyan V. A national catalog of preference-based scores for chronic conditions in the United States. *Med Care*. 2005; 43(7):736–49. <https://doi.org/10.1097/01.mlr.0000172050.67085.4f> PMID: 15970790
31. Gerson LB, Ullah N, Hastie T, Triadafilopoulos G, Goldstein M. Patient-derived health state utilities for gastroesophageal reflux disease. *Am J Gastroenterol*. 2005; 100(3):524–33. <https://doi.org/10.1111/j.1572-0241.2005.40588.x> PMID: 15743346
32. Berg SK, Rasmussen TB, Thrysoe L, Lauberg A, Borregaard B, Christensen AV, et al. DenHeart: Differences in physical and mental health across cardiac diagnoses at hospital discharge. *J Psychosom Res*. 2017; 94:1–9. <https://doi.org/10.1016/j.jpsychores.2017.01.003> PMID: 28183396
33. Galante J, Augustovski F, Colantonio L, Bardach A, Caporale J, Marti SG, et al. Estimation and comparison of EQ-5D health states' utility weights for pneumococcal and human papillomavirus diseases in Argentina, Chile, and the United Kingdom. *Value Health*. 2011; 14(5 Suppl 1):S60–4. <https://doi.org/10.1016/j.jval.2011.05.007> PMID: 21839901
34. Barbut F, Galperine T, Vanhems P, Le Monnier A, Durand-Gasselien B, Canis F, et al. Quality of life and utility decrement associated with *Clostridium difficile* infection in a French hospital setting. *Health Qual Life Outcomes*. 2019; 17(1):6. <https://doi.org/10.1186/s12955-019-1081-5> PMID: 30634997
35. Suter-Widmer I, Christ-Crain M, Zimmerli W, Albrich W, Mueller B, Schuetz P, et al. Predictors for length of hospital stay in patients with community-acquired pneumonia: results from a Swiss multicenter study. *BMC Pulm Med*. 2012; 12:21. <https://doi.org/10.1186/1471-2466-12-21> PMID: 22607483
36. Cheungpasitporn W, Thongprayoon C, Qian Q. Dysmagnesemia in Hospitalized Patients: Prevalence and Prognostic Importance. *Mayo Clin Proc*. 2015; 90(8):1001–10. <https://doi.org/10.1016/j.mayocp.2015.04.023> PMID: 26250725
37. Almirall J, Bolibar I, Vidal J, Sauca G, Coll P, Niklasson B, et al. Epidemiology of community-acquired pneumonia in adults: a population-based study. *Eur Respir J*. 2000; 15(4):757–63. <https://doi.org/10.1034/j.1399-3003.2000.15d21.x> PMID: 10780770
38. Census and Statistics Department, The Government of the Hong Kong SAR. Hong Kong Life Tables, 1971–2022. <https://www.censtatd.gov.hk/en/EIndexbySubject.html?pcode=D5320184&scode=160> [Accessed 16 October 2023]

39. Hospital Authority. Fees and Charges. [https://www.ha.org.hk/visitor/ha\\_visitor\\_index.asp?Content\\_ID=10045&Lang=ENG](https://www.ha.org.hk/visitor/ha_visitor_index.asp?Content_ID=10045&Lang=ENG) [Accessed 16 October 2023].
40. Bartolomé M, Almirall J, Morera J, Pera G, Ortún V, Bassa J, et al. A population-based study of the costs of care for community-acquired pneumonia. *Eur Respir J*. 2004; 23(4):610–6. <https://doi.org/10.1183/09031936.04.00076704> PMID: 15083763
41. You JH, Lee AC, Wong SC, Chan FK. Low-dose or standard-dose proton pump inhibitors for maintenance therapy of gastro-oesophageal reflux disease: a cost-effectiveness analysis. *Aliment Pharmacol Ther*. 2003; 17(6):785–92. <https://doi.org/10.1046/j.1365-2036.2003.01526.x> PMID: 12641500
42. Civil Service Bureau, The Government of the Hong Kong SAR. Master Pay Scale. <https://www.csb.gov.hk/english/admin/pay/42.html> [Accessed 16 October 2023].
43. Clark CM, LaValley SA, Singh R, Mustafa E, Monte SV, Wahler RG Jr. A pharmacist-led pilot program to facilitate deprescribing in a primary care clinic. *J Am Pharm Assoc (2003)*. 2020; 60(1):105–111. <https://doi.org/10.1016/j.japh.2019.09.011> PMID: 31690514
44. World Health Organization, Tan-Torres Edejer T, Baltussen R, Adam T, Hutubessy R, Acharya A, et al. Making choices in health: Who guide to cost-effectiveness analysis. 2003.
45. Census and Statistics Department, The Government of the Hong Kong SAR. Gross Domestic Product (GDP), implicit price deflator of GDP and per capita GDP. [https://www.censtatd.gov.hk/en/web\\_table.html?id=310-31001](https://www.censtatd.gov.hk/en/web_table.html?id=310-31001) [Accessed 16 October 2023].
46. Alsallal M, Alsubaiei N, Assiri E, Amireh A, Booth A, Kofi M. Effectiveness and Cost Effectiveness of Pharmacist-led Deprescribing Interventions in Nursing Homes and Ambulatory Care Settings in Elderly Patients: A Systematic Review. *J Family Med Prim Care Open Acc*. 2022; 6:170.
47. Chau SH, Sluiter RL, Hugtenburg JG, Wensing M, Kievit W, Teichert M. Cost-Utility and Budget Impact Analysis for Stopping the Inappropriate Use of Proton Pump Inhibitors After Cessation of NSAID or Low-Dose Acetylsalicylic Acid Treatment. *Drugs Aging*. 2020; 37(1):67–74. <https://doi.org/10.1007/s40266-019-00713-5> PMID: 31560115
48. Sanyal C, Turner JP, Martin P, Tannenbaum C. Cost-Effectiveness of Pharmacist-Led Deprescribing of NSAIDs in Community-Dwelling Older Adults. *J Am Geriatr Soc*. 2020; 68(5):1090–1097. <https://doi.org/10.1111/jgs.16388> PMID: 32105355
49. Turner JP, Sanyal C, Martin P, Tannenbaum C. Economic Evaluation of Sedative Deprescribing in Older Adults by Community Pharmacists. *J Gerontol A Biol Sci Med Sci*. 2021; 76(6):1061–1067. <https://doi.org/10.1093/gerona/glaa180> PMID: 32761069
